# Supplementary material for: Population genetic structure of Picea engelmannii, P. glauca and their previously unrecognized hybrids in the central Rocky Mountains
Source: Springer Nature journal article supplement (doi:10.1007/s11295-012-0583-7), 2013-01-17
Supplement: 11295_2012_583_MOESM1_ESM.pdf [file 11295_2012_583_MOESM1_ESM.pdf]

Population genetic structure of *Picea engelmannii*, *P. glauca*  
and their previously unrecognized hybrids in the central  
Rocky Mountains

Supplemental material

Table S1: Pairwise differentiation between parental (in italics) *P. glauca* (WBH, WAK, WON), *P. engelmannii* (EAZ, EMB) and focal (MLP, GTS, GTC, GTN, YSC, YSE, YSN, GSB, SLL, SSL, SDI, BHS, BHC) populations. p-values are shown above the diagonal and  $F_{ST}$  below, with significantly differentiated populations at the  $\alpha=0.05$  level highlighted in bold.

|            |              | p-values     |              |              |              |              |              |              |              |              |              |              |              |              |              |              |              |              |
|------------|--------------|--------------|--------------|--------------|--------------|--------------|--------------|--------------|--------------|--------------|--------------|--------------|--------------|--------------|--------------|--------------|--------------|--------------|
| Pop        | EAZ          | EMB          | MLP          | GTS          | GTC          | GTN          | YSC          | YSE          | YSN          | GSB          | SLL          | SSL          | SDI          | BHS          | BHC          | WBH          | WAK          | WON          |
| <i>EAZ</i> | -            | <b>0.003</b> | <b>0.014</b> | <b>0.009</b> | <b>0.001</b> | <b>0.006</b> | <b>0.001</b> | <b>0.001</b> | <b>0.001</b> | <b>0.001</b> | <b>0.001</b> | <b>0.001</b> | <b>0.001</b> | <b>0.001</b> | <b>0.001</b> | <b>0.001</b> | <b>0.001</b> | <b>0.001</b> |
| <i>EMB</i> | <b>0.028</b> | -            | 0.717        | 0.958        | 0.750        | 0.406        | 0.231        | 0.254        | <b>0.027</b> | 0.466        | <b>0.001</b> | <b>0.001</b> | <b>0.001</b> | <b>0.003</b> | 0.168        | <b>0.001</b> | <b>0.001</b> | <b>0.001</b> |
| MLP        | <b>0.020</b> | -0.004       | -            | 0.186        | 0.235        | 0.209        | <b>0.024</b> | <b>0.015</b> | 0.014        | 0.344        | <b>0.001</b> | <b>0.001</b> | <b>0.001</b> | <b>0.001</b> | 0.476        | <b>0.001</b> | <b>0.001</b> | <b>0.001</b> |
| GTS        | <b>0.032</b> | -0.016       | 0.008        | -            | 0.935        | 0.887        | 0.914        | 0.585        | <b>0.021</b> | 0.566        | <b>0.011</b> | <b>0.001</b> | <b>0.001</b> | <b>0.079</b> | 0.461        | <b>0.001</b> | <b>0.001</b> | <b>0.001</b> |
| GTC        | <b>0.058</b> | -0.007       | 0.006        | -0.016       | -            | 0.756        | 0.350        | 0.290        | <b>0.001</b> | 0.576        | <b>0.001</b> | <b>0.001</b> | <b>0.001</b> | <b>0.008</b> | 0.103        | <b>0.001</b> | <b>0.001</b> | <b>0.001</b> |
| GTN        | <b>0.061</b> | 0.003        | 0.011        | -0.025       | -0.013       | -            | 0.957        | 0.144        | 0.100        | 0.419        | <b>0.036</b> | <b>0.028</b> | <b>0.012</b> | 0.576        | 0.511        | <b>0.001</b> | <b>0.001</b> | <b>0.001</b> |
| YSC        | <b>0.052</b> | 0.004        | <b>0.017</b> | -0.011       | 0.002        | -0.023       | -            | 0.157        | <b>0.001</b> | 0.220        | <b>0.002</b> | <b>0.001</b> | <b>0.001</b> | <b>0.016</b> | 0.057        | <b>0.001</b> | <b>0.001</b> | <b>0.001</b> |
| YSE        | <b>0.054</b> | 0.007        | <b>0.024</b> | -0.004       | 0.005        | 0.020        | 0.009        | -            | <b>0.001</b> | 0.054        | <b>0.001</b> | <b>0.001</b> | <b>0.001</b> | <b>0.001</b> | <b>0.016</b> | <b>0.001</b> | <b>0.001</b> | <b>0.001</b> |
| YSN        | <b>0.039</b> | <b>0.012</b> | <b>0.013</b> | <b>0.015</b> | <b>0.038</b> | <b>0.018</b> | <b>0.022</b> | <b>0.038</b> | -            | <b>0.021</b> | 0.083        | <b>0.003</b> | <b>0.001</b> | <b>0.001</b> | 0.506        | <b>0.001</b> | <b>0.001</b> | <b>0.001</b> |
| GSB        | <b>0.048</b> | 0.001        | 0.003        | -0.003       | -0.004       | 0.003        | 0.007        | 0.025        | <b>0.024</b> | -            | <b>0.004</b> | <b>0.001</b> | <b>0.001</b> | <b>0.021</b> | 0.103        | <b>0.001</b> | <b>0.001</b> | <b>0.001</b> |
| SLL        | <b>0.083</b> | <b>0.050</b> | <b>0.051</b> | <b>0.035</b> | <b>0.067</b> | <b>0.035</b> | <b>0.037</b> | <b>0.076</b> | 0.012        | <b>0.058</b> | -            | 0.293        | <b>0.005</b> | <b>0.013</b> | 0.134        | <b>0.001</b> | <b>0.001</b> | <b>0.001</b> |
| SSL        | <b>0.101</b> | <b>0.049</b> | <b>0.045</b> | <b>0.046</b> | <b>0.067</b> | <b>0.036</b> | <b>0.040</b> | <b>0.082</b> | <b>0.031</b> | <b>0.061</b> | 0.004        | <b>0.054</b> | <b>0.001</b> | <b>0.001</b> | <b>0.011</b> | <b>0.001</b> | <b>0.001</b> | <b>0.001</b> |
| SDI        | <b>0.080</b> | <b>0.063</b> | <b>0.052</b> | <b>0.061</b> | <b>0.078</b> | <b>0.067</b> | <b>0.070</b> | <b>0.042</b> | <b>0.012</b> | <b>0.023</b> | <b>0.024</b> | <b>0.021</b> | -            | <b>0.003</b> | <b>0.001</b> | <b>0.001</b> | <b>0.001</b> | <b>0.001</b> |
| BHS        | <b>0.056</b> | <b>0.020</b> | <b>0.021</b> | 0.010        | <b>0.022</b> | -0.004       | <b>0.011</b> | <b>0.042</b> | <b>0.012</b> | <b>0.023</b> | <b>0.024</b> | <b>0.021</b> | <b>0.052</b> | 0.589        | <b>0.001</b> | <b>0.001</b> | <b>0.001</b> | <b>0.001</b> |
| BHC        | <b>0.043</b> | 0.006        | 0.000        | 0.000        | 0.012        | -0.002       | 0.012        | 0.026        | 0.000        | 0.014        | 0.010        | 0.019        | <b>0.042</b> | -            | <b>0.001</b> | <b>0.001</b> | <b>0.001</b> | <b>0.001</b> |
| <i>WBH</i> | <b>0.167</b> | <b>0.129</b> | <b>0.118</b> | <b>0.143</b> | <b>0.158</b> | <b>0.140</b> | <b>0.129</b> | <b>0.170</b> | <b>0.065</b> | <b>0.154</b> | <b>0.066</b> | <b>0.053</b> | <b>0.110</b> | <b>0.079</b> | <b>0.080</b> | -            | <b>0.001</b> | <b>0.001</b> |
| <i>WAK</i> | <b>0.223</b> | <b>0.192</b> | <b>0.176</b> | <b>0.193</b> | <b>0.223</b> | <b>0.197</b> | <b>0.170</b> | <b>0.233</b> | <b>0.098</b> | <b>0.221</b> | <b>0.099</b> | <b>0.067</b> | <b>0.143</b> | <b>0.112</b> | <b>0.128</b> | <b>0.045</b> | -            | <b>0.004</b> |
| <i>WON</i> | <b>0.201</b> | <b>0.181</b> | <b>0.164</b> | <b>0.177</b> | <b>0.194</b> | <b>0.162</b> | <b>0.162</b> | <b>0.201</b> | <b>0.090</b> | <b>0.203</b> | <b>0.080</b> | <b>0.079</b> | <b>0.116</b> | <b>0.098</b> | <b>0.110</b> | <b>0.045</b> | <b>0.037</b> | -            |

Table S2: Estimates of average linkage disequilibrium (LD;  $\Delta$ ) in 18 populations of parental *P. glauca* (WBH, WAK, WON), *P. engelmannii* (EAZ, EMB) and focal (MLP, GTS, GTC, GTN, YSC, YSE, YSN, GSB, SLL, SSL, SDI, BHS, BHC) populations.

| Population | Mean    | Max    | 90% quantile |
|------------|---------|--------|--------------|
| EAZ        | 0.00460 | 0.0651 | 0.0105       |
| EMB        | 0.00516 | 0.0378 | 0.0131       |
| MLP        | 0.00594 | 0.0346 | 0.0118       |
| GTS        | 0.00778 | 0.0473 | 0.0178       |
| GTC        | 0.00516 | 0.0231 | 0.0124       |
| GTN        | 0.00761 | 0.0600 | 0.0199       |
| YSC        | 0.00631 | 0.0325 | 0.0137       |
| YSE        | 0.01030 | 0.1100 | 0.0249       |
| YSN        | 0.00523 | 0.0179 | 0.0098       |
| GSB        | 0.00764 | 0.0469 | 0.0156       |
| SLL        | 0.00807 | 0.0450 | 0.0199       |
| SSL        | 0.00455 | 0.0300 | 0.0108       |
| SDI        | 0.00624 | 0.0496 | 0.0138       |
| BHS        | 0.00511 | 0.0204 | 0.0086       |
| BHC        | 0.00886 | 0.0311 | 0.0161       |
| WBH        | 0.00394 | 0.0311 | 0.0089       |
| WAK        | 0.00338 | 0.0260 | 0.0081       |
| WON        | 0.00517 | 0.0286 | 0.0146       |

A. Estimate of K based on L(K)

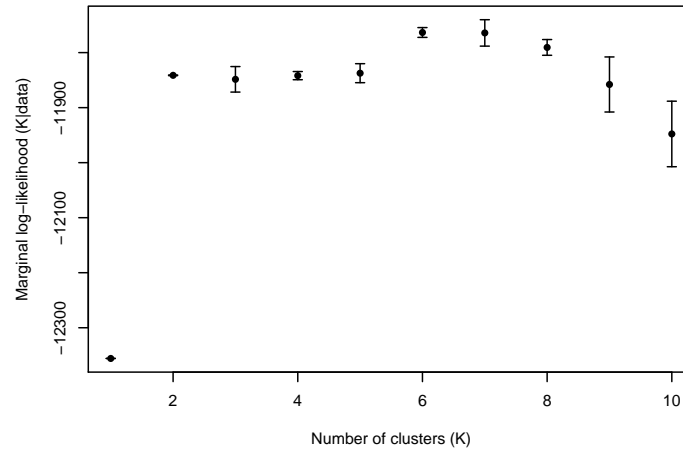

B. Estimate of K based on  $\Delta K$

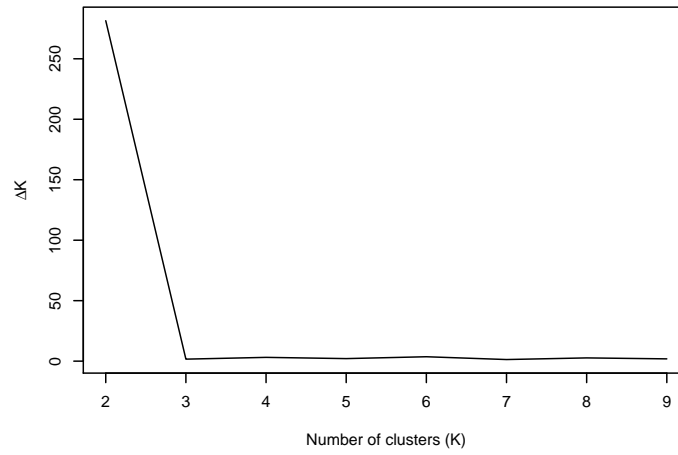

Figure S1: Estimates of  $\ln(K | \text{data})$  in *structure*. A. Mean estimates of K ranging from 1–10 including standard error bars from 10 replicate runs of MCMC. B. Estimates of K based on  $\Delta K$  (Evanno et al. 2005).

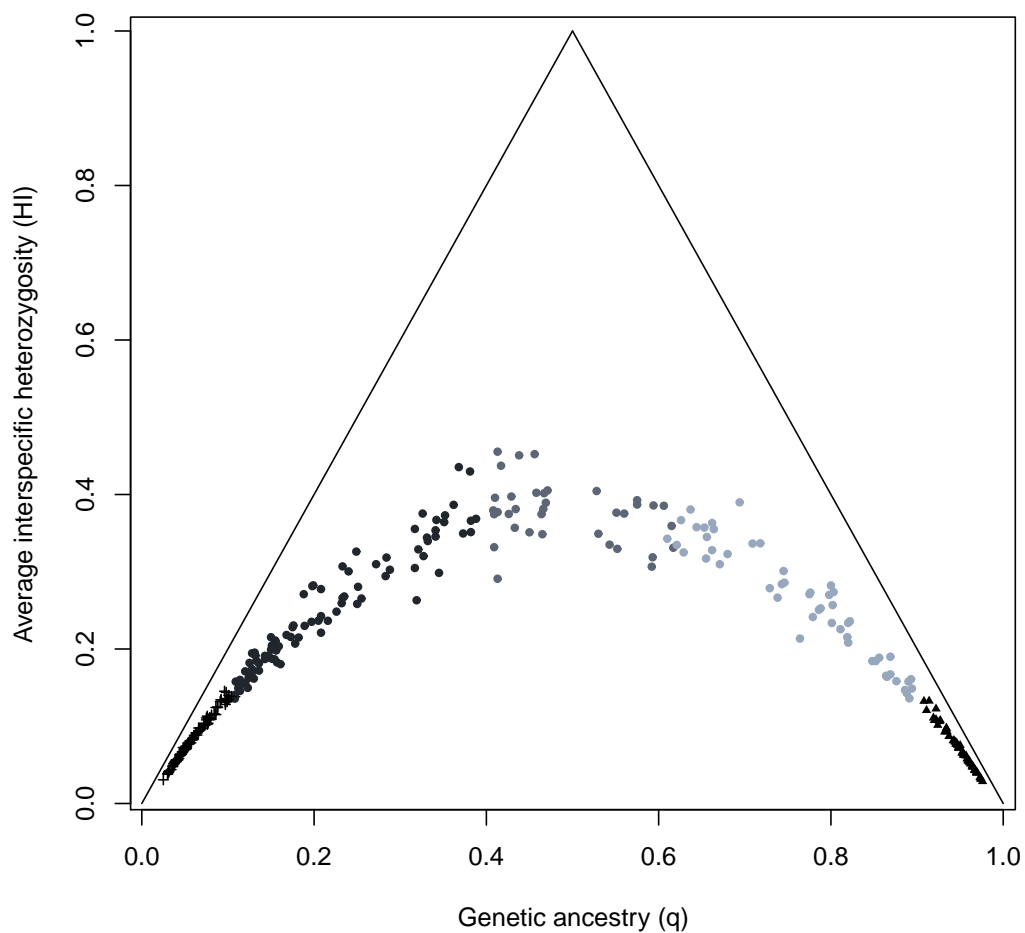

Figure S2: Genetic ancestry ( $q$ ) versus average interspecific heterozygosity ( $H_I$ ) for 336 individuals of parental *Picea engelmannii* and *P. glauca*, and focal individuals. Symbols represent each individual's genetic ancestry ( $q$ ) detected using microsatellites during the course of this study: crosses (*P. engelmannii* ancestry),  $q \leq 0.10$ ; dark grey circles,  $0.11 \leq q \leq 0.39$ ; grey circles,  $0.40 \leq q \leq 0.59$ ; light grey circles,  $0.60 \leq q \leq 0.89$ ; triangles (*P. glauca* ancestry),  $q \geq 0.90$ .

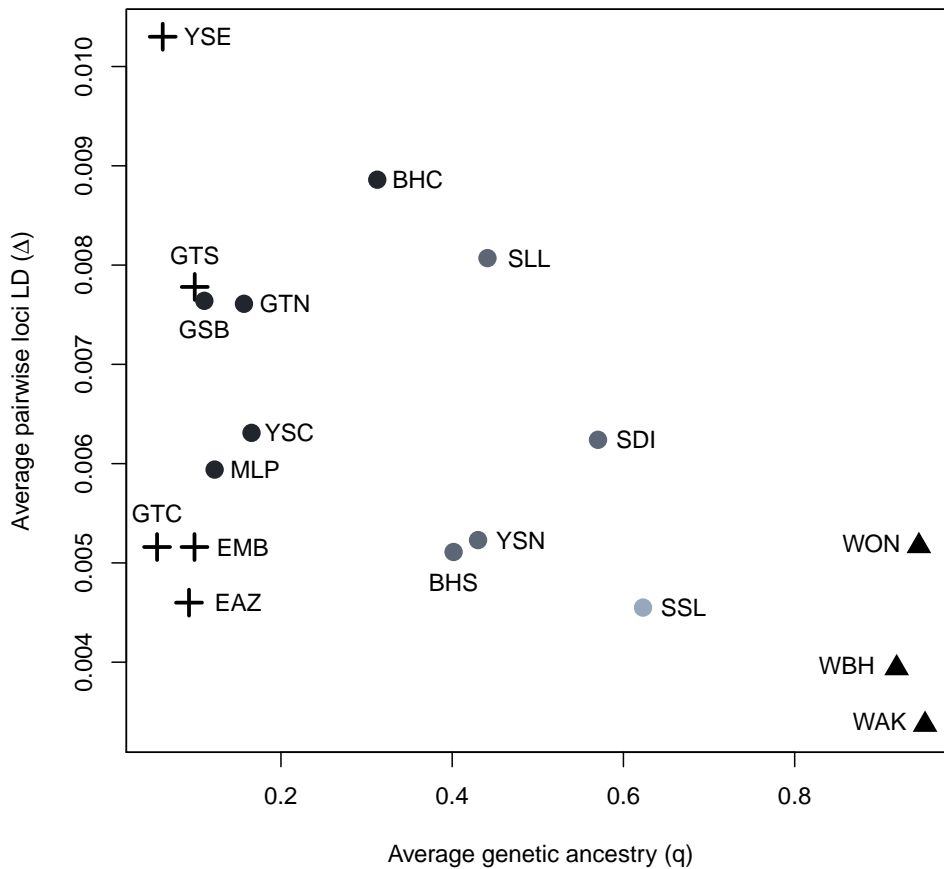

Figure S3: Average population genetic ancestry ( $q$ ) versus average pairwise linkage disequilibrium (LD;  $\Delta$ ) of parental *P. glauca* (WBH, WAK, WON), *P. engelmannii* (EAZ, EMB) and focal (MLP, GTS, GTC, GTN, YSC, YSE, YSN, GSB, SLL, SSL, SDI, BHS, BHC) individuals. Symbols represent mean genetic ancestry ( $q$ ) for each population detected using microsatellites during the course of this study: crosses (*P. engelmannii* ancestry),  $q \leq 0.10$ ; dark grey circles,  $0.11 \leq q \leq 0.39$ ; grey circles,  $0.40 \leq q \leq 0.59$ ; light grey circles,  $0.60 \leq q \leq 0.89$ ; triangles (*P. glauca* ancestry),  $q \geq 0.90$ .

## References

Evanno G, Regnaut S, Goudet J (2005) Detecting the number of clusters of individuals using the software STRUCTURE: a simulation study. *Molecular Ecology* 14(8):2611–2620
